# Supplementary material for: ClusterViSu, a method for clustering of protein complexes by Voronoi tessellation in super-resolution microscopy
Source: PubMed Central journal article supplement (PMC4828638; doi:10.1038/srep24084), 2016-04-12
Supplement: srep24084-s1.pdf [file srep24084-s1.pdf]

# **ClusterViSu, a method for clustering of protein complexes by Voronoi tessellation in super-resolution microscopy**

Leonid Andronov<sup>1,2,3,4</sup>, Igor Orlov<sup>1,2,3,4</sup>, Yves Lutz<sup>1,2,3,4</sup>, Jean-Luc Vonesch<sup>1,2,3,4</sup>, Bruno P. Klaholz<sup>1,2,3,4,\*</sup>

<sup>1</sup>Centre for Integrative Biology (CBI), Department of Integrated Structural Biology, IGBMC (Institute of Genetics and of Molecular and Cellular Biology), 1 rue Laurent Fries, Illkirch, France;

<sup>2</sup>Centre National de la Recherche Scientifique (CNRS) UMR 7104, Illkirch, France; <sup>3</sup>Institut National de la Santé et de la Recherche Médicale (INSERM) U964, Illkirch, France; and

<sup>4</sup>Université de Strasbourg, Strasbourg, France.

\*To whom correspondence should be addressed. [klaholz@igbmc.fr](mailto:klaholz@igbmc.fr)

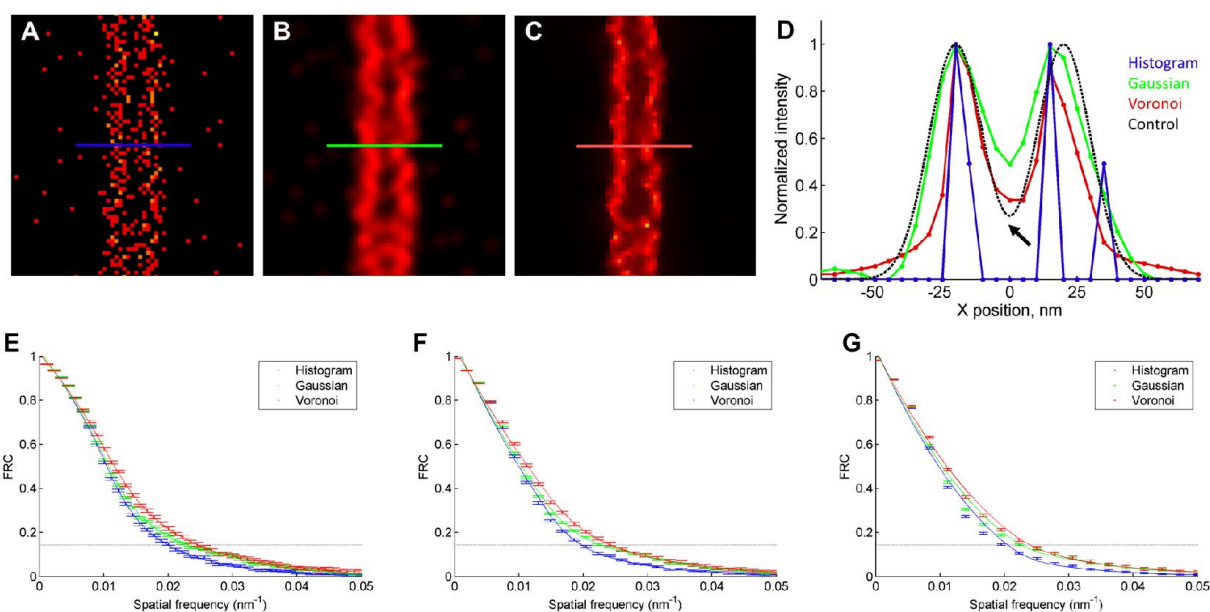

**Figure S1** Evaluation of the quality of Voronoi image reconstruction

(A-C) Simulated images of two lines separated by 40 nm and composed of localization events with a standard deviation of 10 nm in histogram (A), Gaussian (B) and Voronoi-based interpolated (C) local density representations (same as **Figs. 1A-C**, but with line indicating the line profile). (D) One-pixel width profiles along the colored lines of images A-C. (E-G) FRC curves calculated from an image region in **Fig. 1E** in histogram (blue), Gaussian (green) and Voronoi local density (red) representations; pixel size of the image: 5 nm (E), 3 nm (F), 2nm (G). The graphs show only the frequency range from 0 to 0.05 nm<sup>-1</sup> for consistency with **Fig. 1F**.

**Suppl. Fig. S1**

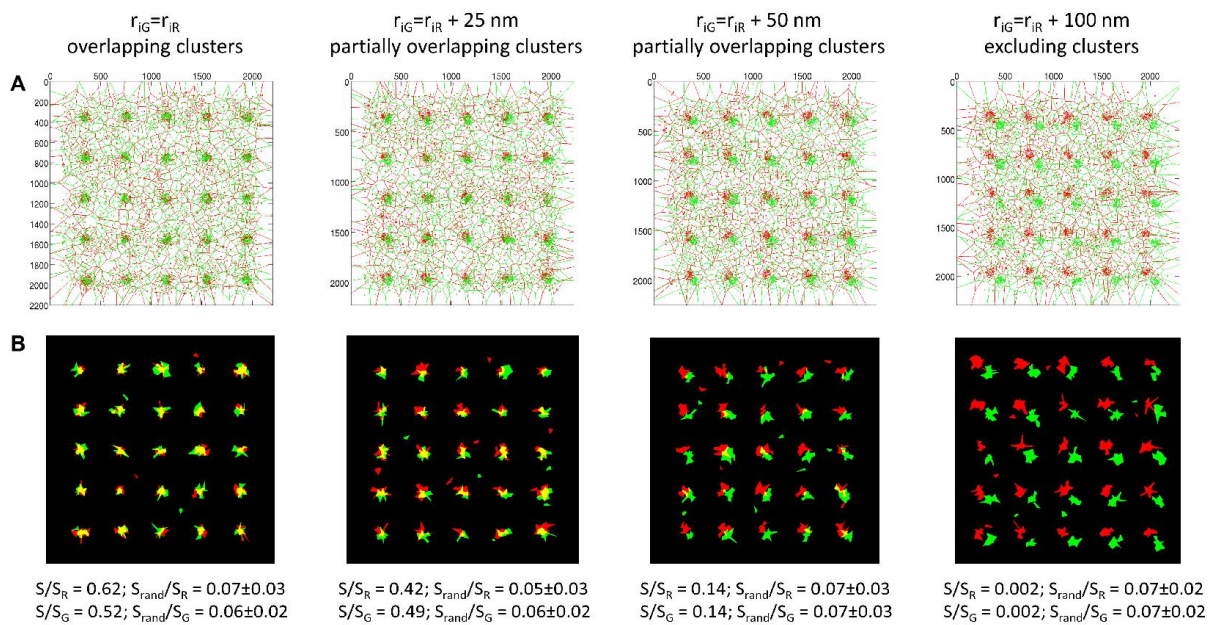

**Figure S2** Simulations of different co-localization scenarios

(A) Voronoi diagrams of simulated double-color clusters. (B) Results of segmentation of the double-color clusters in ClusterViSu with the overlay area shown in yellow and the calculated co-localization values shown below.  $r_{IG}$  and  $r_{IR}$  are the Cartesian coordinates of the centers of the green and the red clusters, respectively. The simulated radius of clusters is 50 nm; density of events in clusters =  $2.5 \cdot 10^{-3} \text{ nm}^{-2}$ , in background =  $1.25 \cdot 10^{-4} \text{ nm}^{-2}$ . Localizations in the clusters and in the background are distributed randomly and independently for each color.

**Suppl. Fig. S2**

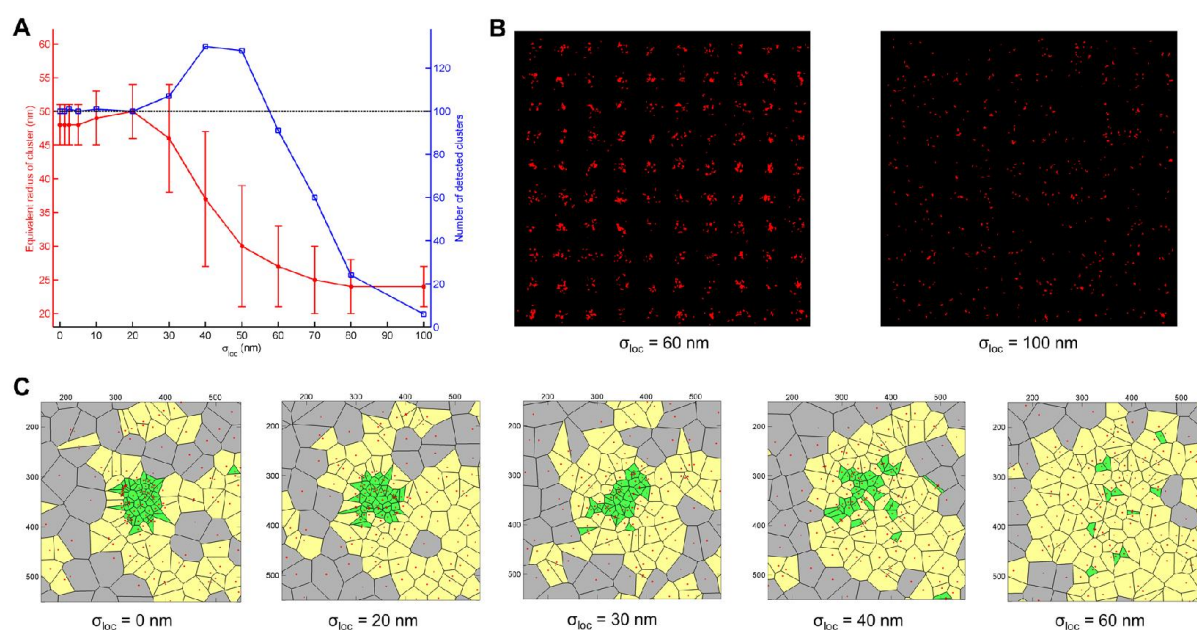

**Figure S3** Effect of the localization error on Voronoi clustering

(A) Results of segmentation of a simulated cluster data with different amounts of localization error.  $\sigma_{loc}$  is the standard deviation of the normal distribution used for simulating the coordinates of the points. Clusters containing 5 or less molecules were removed. (B) Complete segmented FOVs of the simulated data with high localization errors  $\sigma_{loc}$  demonstrating remaining clusters at  $\sigma_{loc} = 60$  nm and  $\sigma_{loc} = 100$  nm. (C) The Voronoi diagrams of the upper-left corner of the simulated data with different localization errors. The density of clustered localizations is  $0.01 \text{ nm}^{-2}$ , the density of background is  $0.002 \text{ nm}^{-2}$ .

**Suppl. Fig. S3**

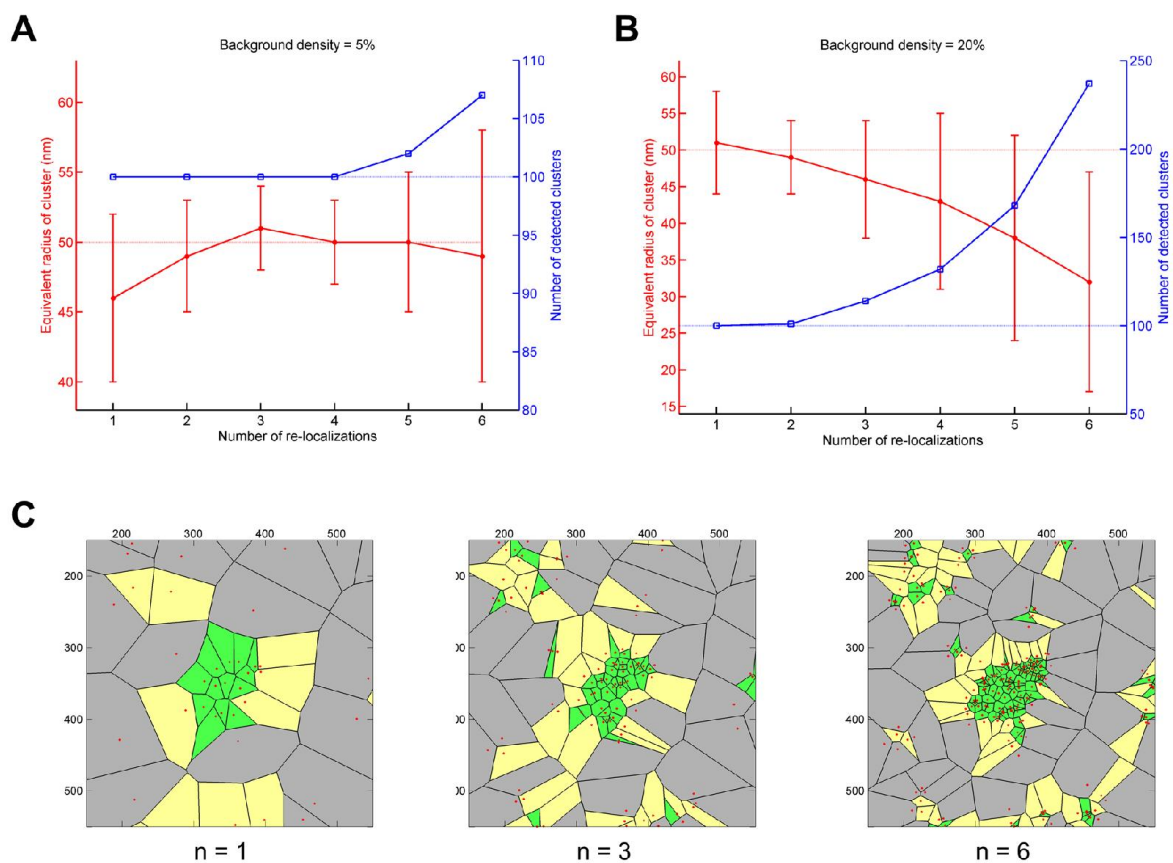

**Figure S4** Effect of multiple localizations on Voronoi clustering

(A&B) Results of segmentation of simulated cluster data with different numbers of re-localizations. Clusters containing 5 or less molecules were removed. (C) Comparison of Voronoi diagrams with different numbers of re-localizations (n). The density of clustered localizations (at n = 1) is 0.0025 nm<sup>-2</sup>, the density of background is 20% of the cluster density; the localization precision  $\sigma_{loc} = 10$  nm.

**Suppl. Fig. S4**

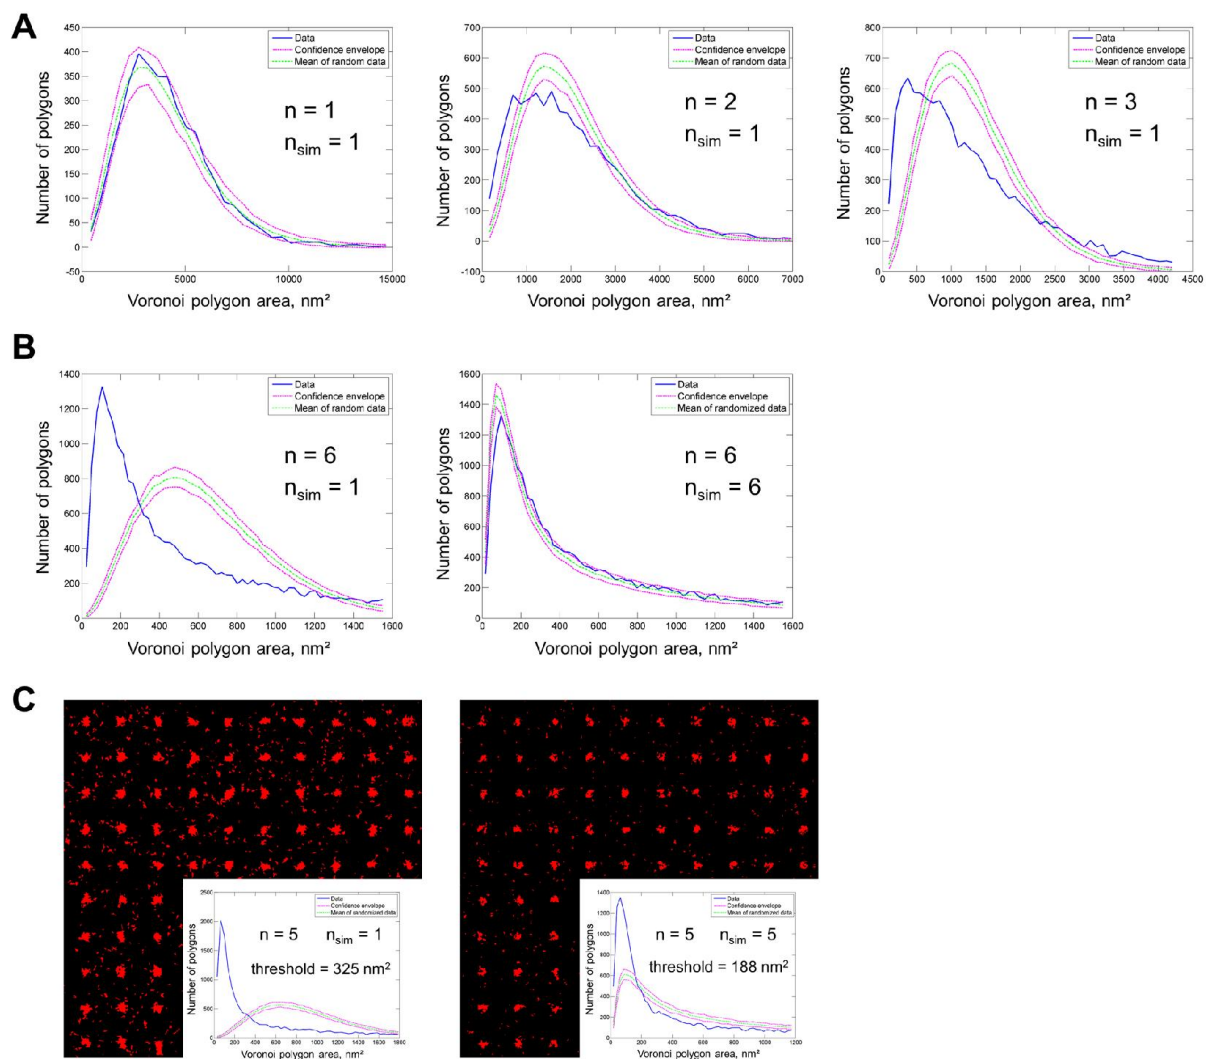

**Figure S5** Effect of multiple localizations on Monte-Carlo simulations

(A&B) Voronoi polygon distributions of spatially random datasets with different numbers of re-localizations ( $n$ ) and results of Monte-Carlo simulations taking into account multiple localizations ( $n_{\text{sim}}$ ). (C) Simulated clustered datasets with re-localizations ( $n = 5$ ) segmented by thresholds determined by simulations without ( $n_{\text{sim}} = 1$ ) and with ( $n_{\text{sim}} = 5$ ) multiple localizations. The density of localizations (at  $n = 1$ ) is  $0.001 \text{ nm}^{-2}$  (A&B); the density of clustered localizations (at  $n = 1$ ) is  $0.0025 \text{ nm}^{-2}$ , the density of background is 20% of the cluster density (C); the localization precision  $\sigma_{\text{loc}} = 10 \text{ nm}$  (A-C).

**Suppl. Fig. S5**

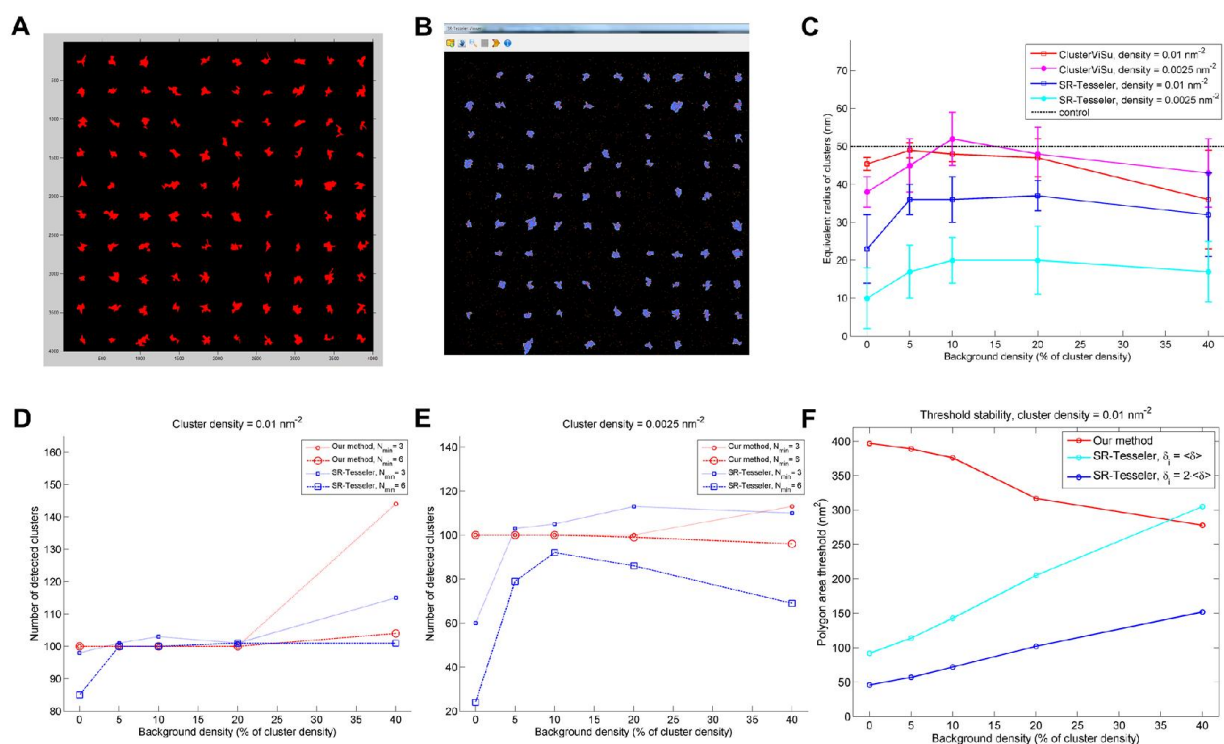

**Figure S6** Comparison of ClusterViSu with SR-Tesseler.

**(A&B)** Clustered dataset segmented in ClusterViSu with threshold determined by Monte-Carlo simulations **(A)** and in SR-Tesseler with threshold determined by average localization density<sup>17</sup>  $\delta_1^i = 2 \cdot \langle \delta \rangle$  **(B)**. Density of clustered localization is  $0.0025 \text{ nm}^{-2}$ , background density is  $0.01 \text{ nm}^{-2}$ . Clusters containing five or less molecules were removed. **(C)** Retrieval of the equivalent radius of clusters in ClusterViSu and SR-Tesseler. Clusters containing two or less molecules were removed. **(D&E)** Number of clusters detected by ClusterViSu (red curves) and SR-Tesseler (blue curves) as function of background density.  $N_{\min}$ , minimal number of events in clusters kept for quantification. **(F)** Variation of segmentation threshold determined by Monte-Carlo simulations in ClusterViSu (red curve) or by average localization density in SR-Tesseler<sup>17</sup> (cyan and blue curves), depending on background density.
